# Supplementary material for: Transplanted interneurons improve memory precision after traumatic brain injury
Source: PubMed Central journal article supplement (PMC6856380; doi:10.1038/s41467-019-13170-w), 2019-11-14
Supplement: 41467_2019_13170_MOESM1_ESM.pdf [file 41467_2019_13170_MOESM1_ESM.pdf]

## **SUPPLEMENTARY INFORMATION**

Transplanted interneurons improve memory precision after traumatic brain injury

### **Authors**

Bingyao Zhu<sup>1</sup>, Jisu Eom<sup>1</sup>, Robert F Hunt<sup>1,2,3</sup>

### **Affiliations**

<sup>1</sup> Department of Anatomy & Neurobiology, University of California, Irvine, CA, 92697, USA

<sup>2</sup> Center for the Neurobiology of Learning and Memory, University of California, Irvine, CA, 92697, USA

<sup>3</sup> Sue and Bill Gross Stem Cell Research Center, University of California, Irvine, CA, 92697, USA

Correspondence to [robert.hunt@uci.edu](mailto:robert.hunt@uci.edu)

### **Contents**

Supplementary Figures 1-4

Supplementary Tables 1 and 2

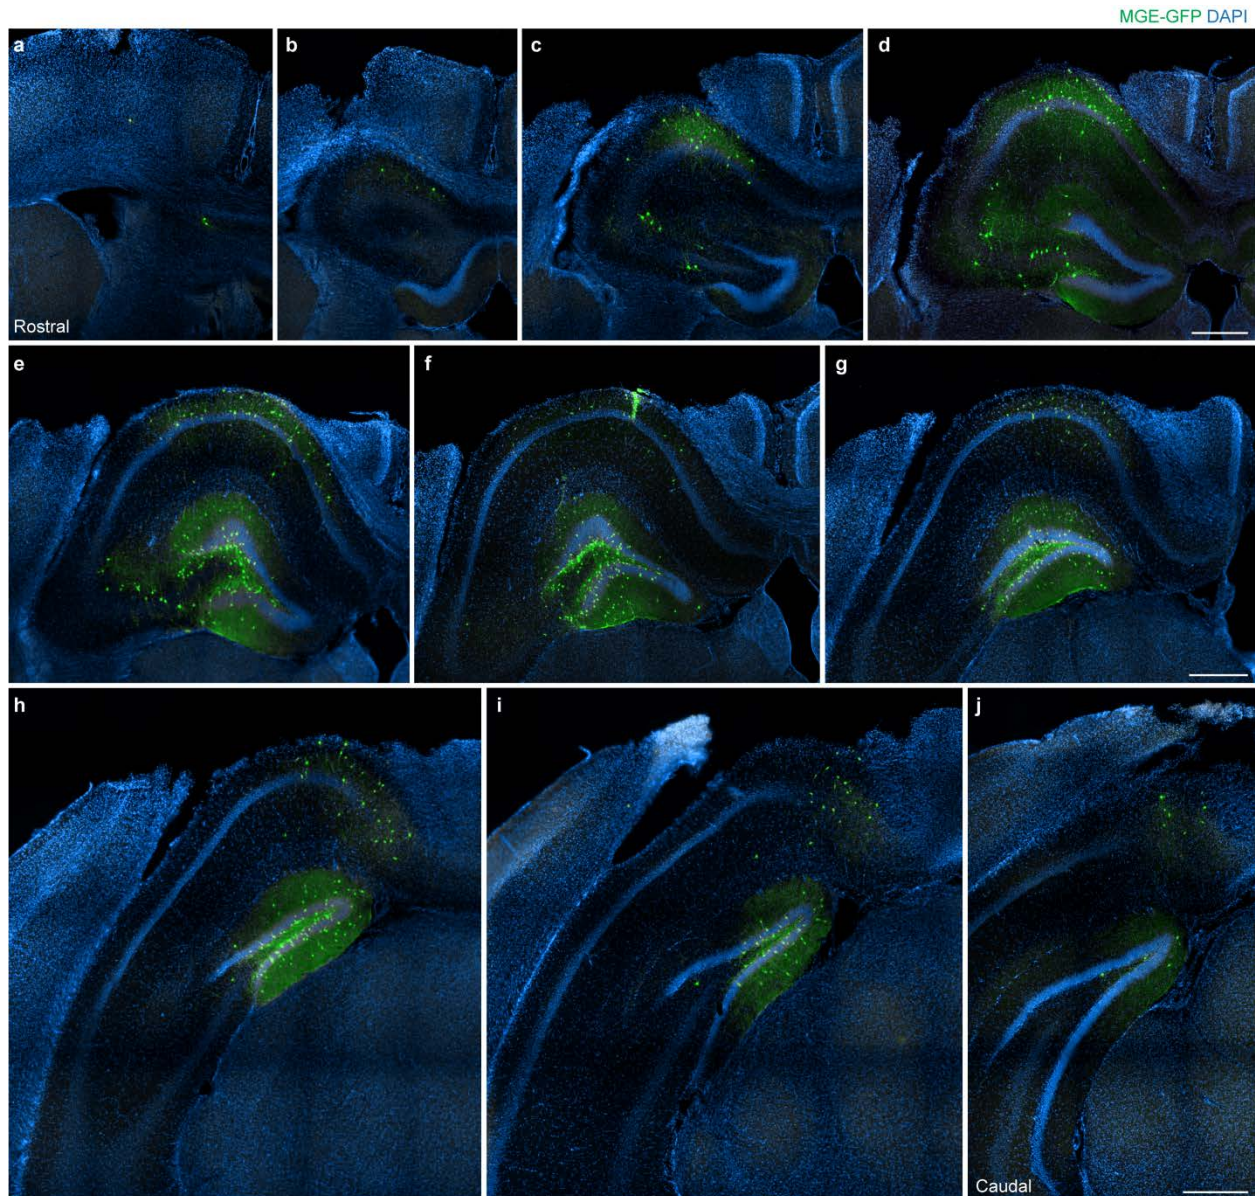

**Supplementary Figure 1. Distribution of transplanted MGE cells 30 DAT into adult brain injured hippocampus. a–j.** Serial sections (300  $\mu\text{m}$  apart) through the entire hippocampus of a recipient mouse labeled for transplanted MGE cells (green) and DAPI (blue). Scale bars, 500  $\mu\text{m}$  (a–d), 500  $\mu\text{m}$  (e–g) and 500  $\mu\text{m}$  (h–j).

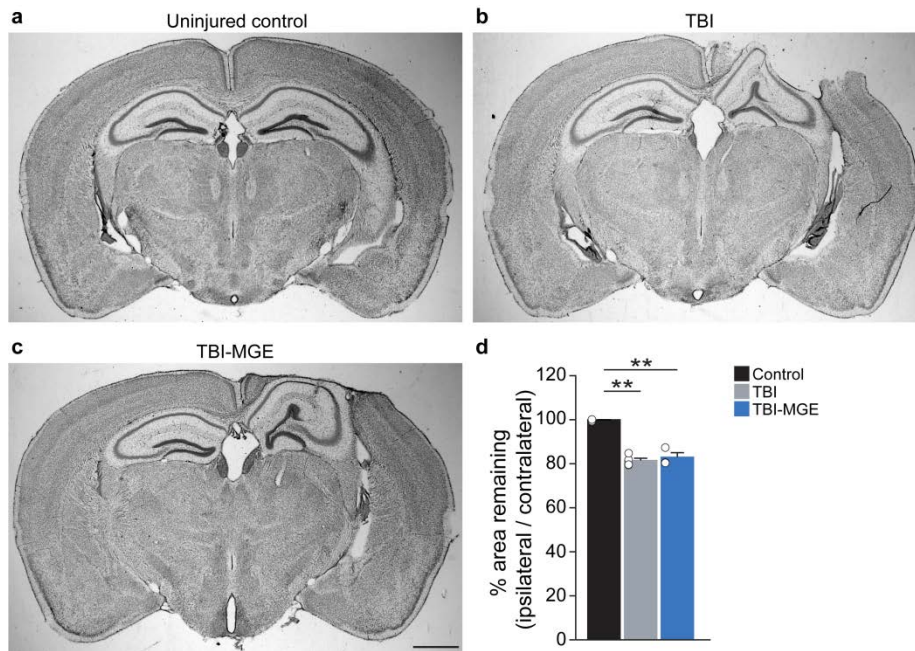

**Supplementary Figure 2. MGE transplantation did not alter the lesion. a-c.** Nissl stained coronal sections taken 125 DAT from the injury epicenter of an uninjured control (a), brain injured animal injected with media (b) and brain injured animal implanted with MGE cells (c). **d.** Quantification of the percent tissue remaining ipsilateral to the injury.  $**P = 0.000004$ , control vs TBI;  $**P = 0.00001$ , control vs TBI-MGE; one-way ANOVA with Bonferroni *post hoc* test.  $n = 5$  control mice,  $n = 4$  TBI mice,  $n = 3$  TBI-MGE mice. Scale bar, 1,000  $\mu\text{m}$ ; error bars, s.e.m. Source data are provided as a Source Data file.

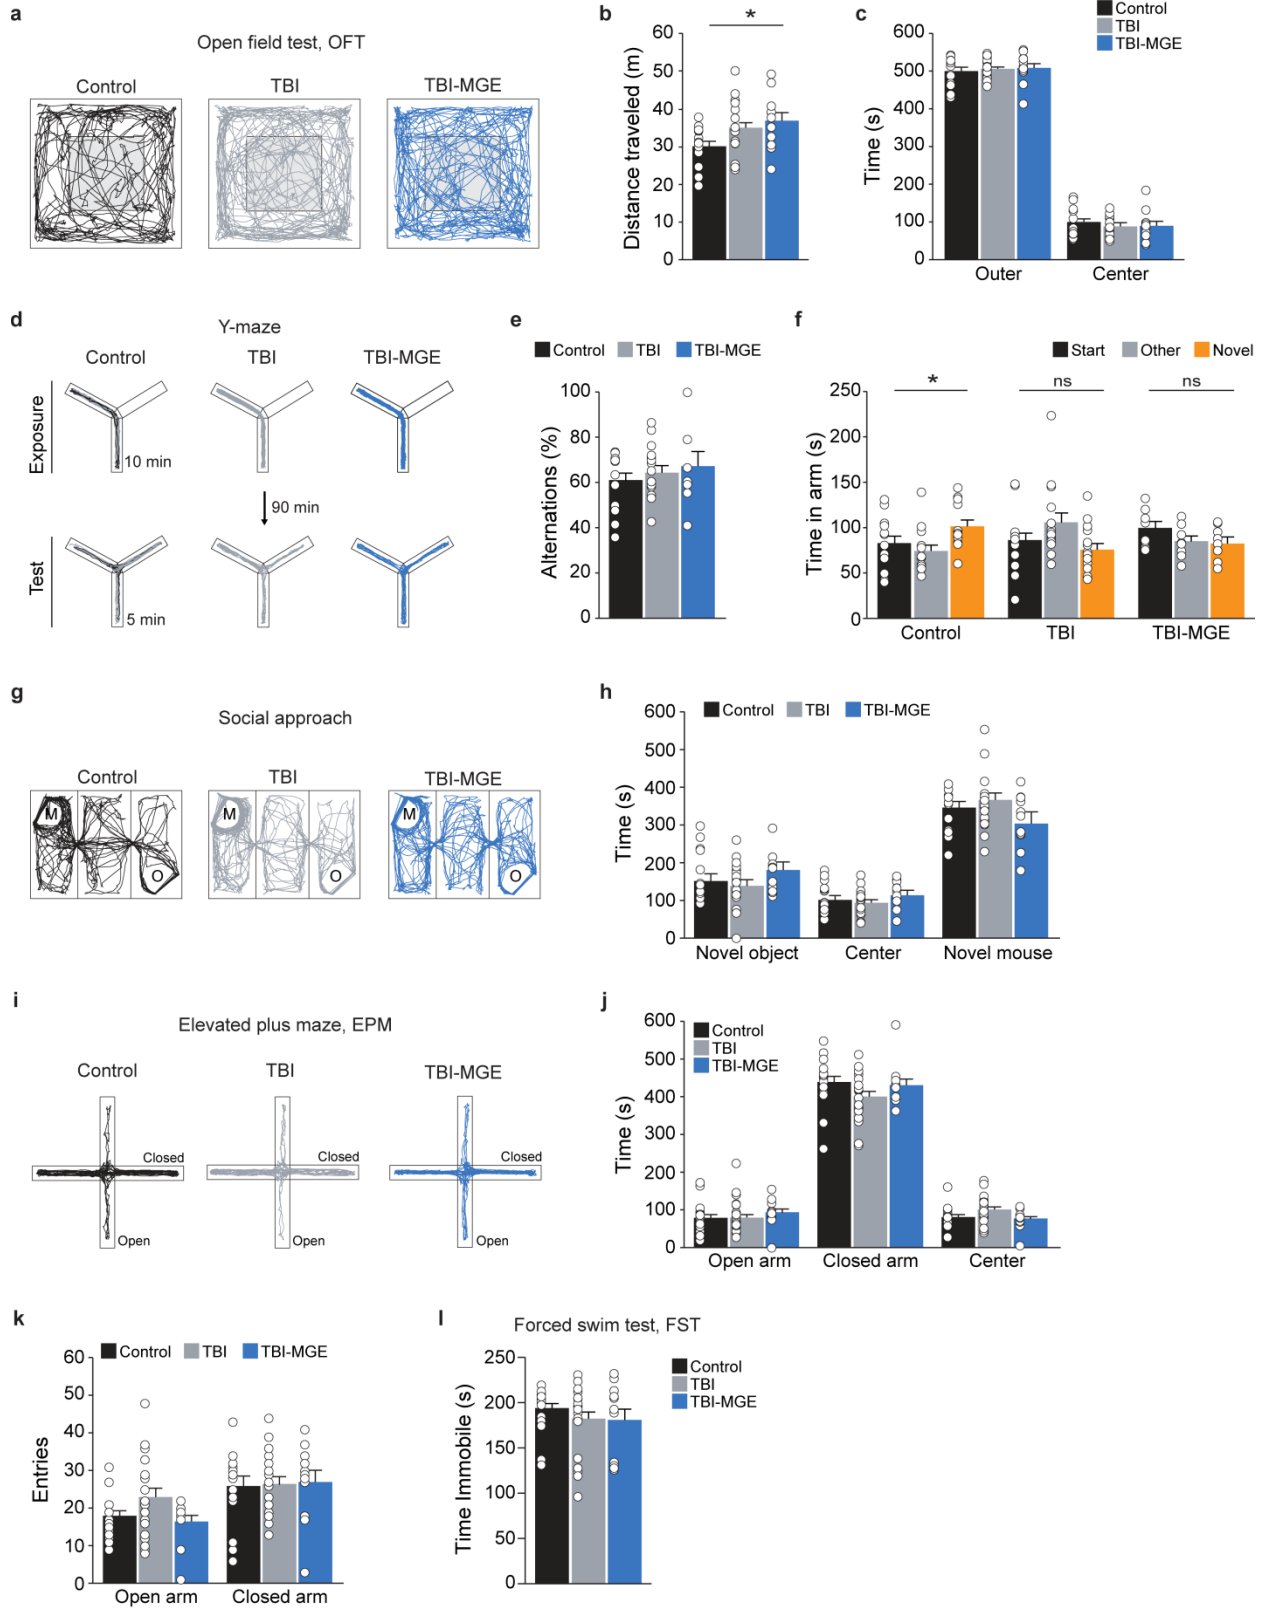

**Supplementary Figure 3. Behavior tests after brain injury and MGE transplantation.** **a.** Representative tracking plots for a mouse in each group of the open field test (OFT). **b.** Distance traveled in the open field.  $*P = 0.03$ , control vs TBI-MGE; one-way ANOVA with Bonferroni *post hoc* test.  $n = 16$  control mice,  $n = 19$  TBI mice,  $n = 11$  TBI-MGE mice. **c.** Time spent in the outer and center portions of the open field. **d.** Representative tracking plots for a mouse in each group of the y-maze test. **e.** Spontaneous alternations during the test phase of the y-maze. **f.** Time spent in each arm during the test phase of the y-maze.  $*P = 0.03$ , other vs novel, one-way ANOVA with Bonferroni *post hoc* test. **g.** Representative tracking plots for a mouse in each group of the social approach assay. M, mouse; O, object. **h.** Quantification of time spent in each chamber. **i.** Representative tracking plots for a mouse in each group of the elevated plus maze (EPM). **j.** Quantification of time spent in each portion of the EPM. **k.** Number of entries made into open or closed arms of the EPM. **l.** Time spent immobile during the forced swim test (FST). Error bars, s.e.m. See Supplementary Data 1 for statistical analyses. Source data are provided as a Source Data file.

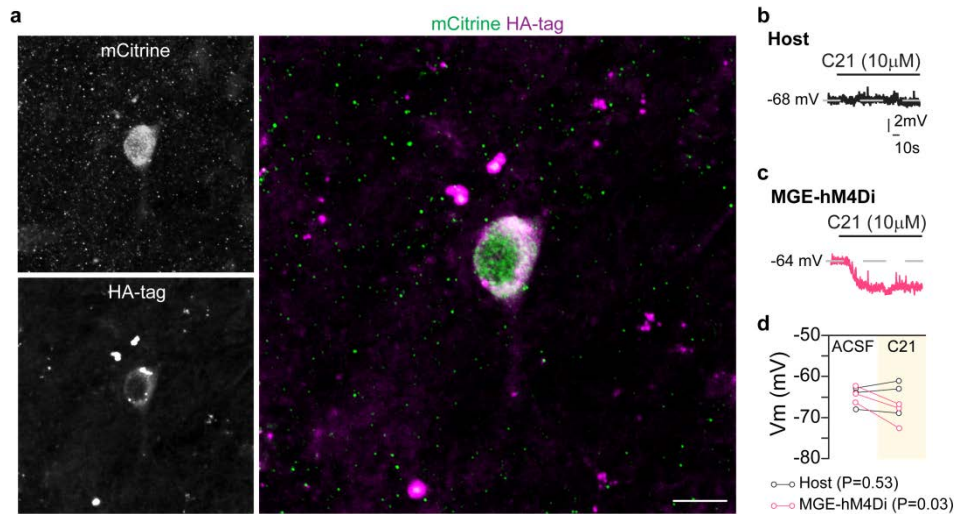

**Supplementary Figure 4. Co-localization of mCitrine and HA-tag in MGE-grafted cells. a.** Representative confocal images of recipient hippocampus labeled for mCitrine-labeled transplanted MGE cells (green) and HA-tag (magenta). Scale bar, 10  $\mu$ m. **b, c.** Voltage responses of a host neuron that did not express hM4Di (**b**) and a transplanted MGE cell expressing hM4Di (MGE-hM4Di) (**c**) to bath application of 10  $\mu$ M Compound 21 (C21). **d.** Quantification of holding potential ( $V_m$ ) for each cell before and after C21 application.  $P = 0.53$ , host neurons,  $P = 0.03$ , MGE-hM4Di neurons; two-tailed paired  $t$ -test.  $n = 3$  cells from 2 animals per group. Source data are provided as a Source Data file.

**Supplementary Table 1: EPSC properties of dentate granule cells**

| No. of cells                             | Property       | Group   | Mean $\pm$ SEM   | Test          | Statistics                                      | Post-hoc test | Post-hoc P-value                                                                    |
|------------------------------------------|----------------|---------|------------------|---------------|-------------------------------------------------|---------------|-------------------------------------------------------------------------------------|
| Control = 11<br>TBI = 12<br>TBI-MGE = 13 | Frequency (Hz) | Control | 4.43 $\pm$ 0.41  | One-way ANOVA | F(2, 33) = 10.24<br>P = 0.0003; $\eta^2$ = 0.38 | Bonferroni    | Control vs TBI, P=0.0039<br>Control vs TBI-MGE, P=0.99<br>TBI vs TBI-MGE, P= 0.0005 |
|                                          |                | TBI     | 1.44 $\pm$ 0.24  |               |                                                 |               |                                                                                     |
|                                          |                | TBI-MGE | 4.88 $\pm$ 0.84  |               |                                                 |               |                                                                                     |
|                                          | Amplitude (pA) | Control | 37.72 $\pm$ 4.93 | One-way ANOVA | F(2, 33) = 0.18<br>P = 0.84; $\eta^2$ = 0.01    | -             | -                                                                                   |
|                                          |                | TBI     | 39.46 $\pm$ 4.65 |               |                                                 |               |                                                                                     |
|                                          |                | TBI-MGE | 36.01 $\pm$ 2.92 |               |                                                 |               |                                                                                     |
|                                          | 10-90% RT (ms) | Control | 1.06 $\pm$ 0.03  | One-way ANOVA | F(2, 33) = 10.23<br>P = 0.0003; $\eta^2$ = 0.38 | Bonferroni    | Control vs TBI, P=0.0034<br>Control vs TBI-MGE, P=0.99<br>TBI vs TBI-MGE, P= 0.0006 |
|                                          |                | TBI     | 1.41 $\pm$ 0.10  |               |                                                 |               |                                                                                     |
|                                          |                | TBI-MGE | 1.01 $\pm$ 0.06  |               |                                                 |               |                                                                                     |
|                                          | Decay tau (ms) | Control | 5.64 $\pm$ 0.59  | One-way ANOVA | F(2, 33) = 4.45<br>P = 0.0195; $\eta^2$ = 0.21  | Bonferroni    | Control vs TBI, P=0.04<br>Control vs TBI-MGE, P=0.99<br>TBI vs TBI-MGE, P= 0.04     |
|                                          |                | TBI     | 8.82 $\pm$ 1.37  |               |                                                 |               |                                                                                     |
|                                          |                | TBI-MGE | 5.70 $\pm$ 0.25  |               |                                                 |               |                                                                                     |

**Supplementary Table 2: List of primary antibodies**

| <b>Antigen</b> | <b>Host</b> | <b>Clonality</b> | <b>Dilution</b> | <b>Supplier</b>                         | <b>Cat No.</b> |
|----------------|-------------|------------------|-----------------|-----------------------------------------|----------------|
| CR             | rabbit      | polyclonal       | 1:1000          | Millipore                               | AB5054         |
| GAD67          | mouse       | monoclonal       | 1:1000          | Millipore                               | MAB5406        |
| GFAP           | mouse       | monoclonal       | 1:500           | Millipore                               | MAB3402        |
| GFP            | chicken     | polyclonal       | 1:1000          | Aves Labs                               | GFP-1020       |
| HA-Tag         | rabbit      | monoclonal       | 1:500           | Cell Signaling Technology               | 3724S          |
| IBA1           | rabbit      | polyclonal       | 1:1000          | FUJIFILM Wako Pure Chemical Corporation | 019-19741      |
| NeuN           | mouse       | monoclonal       | 1:500           | Millipore                               | MAB377         |
| nNOS           | rabbit      | polyclonal       | 1:1000          | Millipore                               | AB5380         |
| PV             | mouse       | monoclonal       | 1:500           | Sigma-Aldrich                           | P3088          |
| Reelin         | mouse       | monoclonal       | 1:1000          | Millipore                               | MAB5364        |
| SST            | goat        | polyclonal       | 1:200           | Santa Cruz Biotechnology                | SC-7819        |
| VIP            | rabbit      | polyclonal       | 1:1000          | ImmunoStar                              | 20077          |
